# Supplementary material
Source: PubMed Central journal article supplement (PMC4433151)

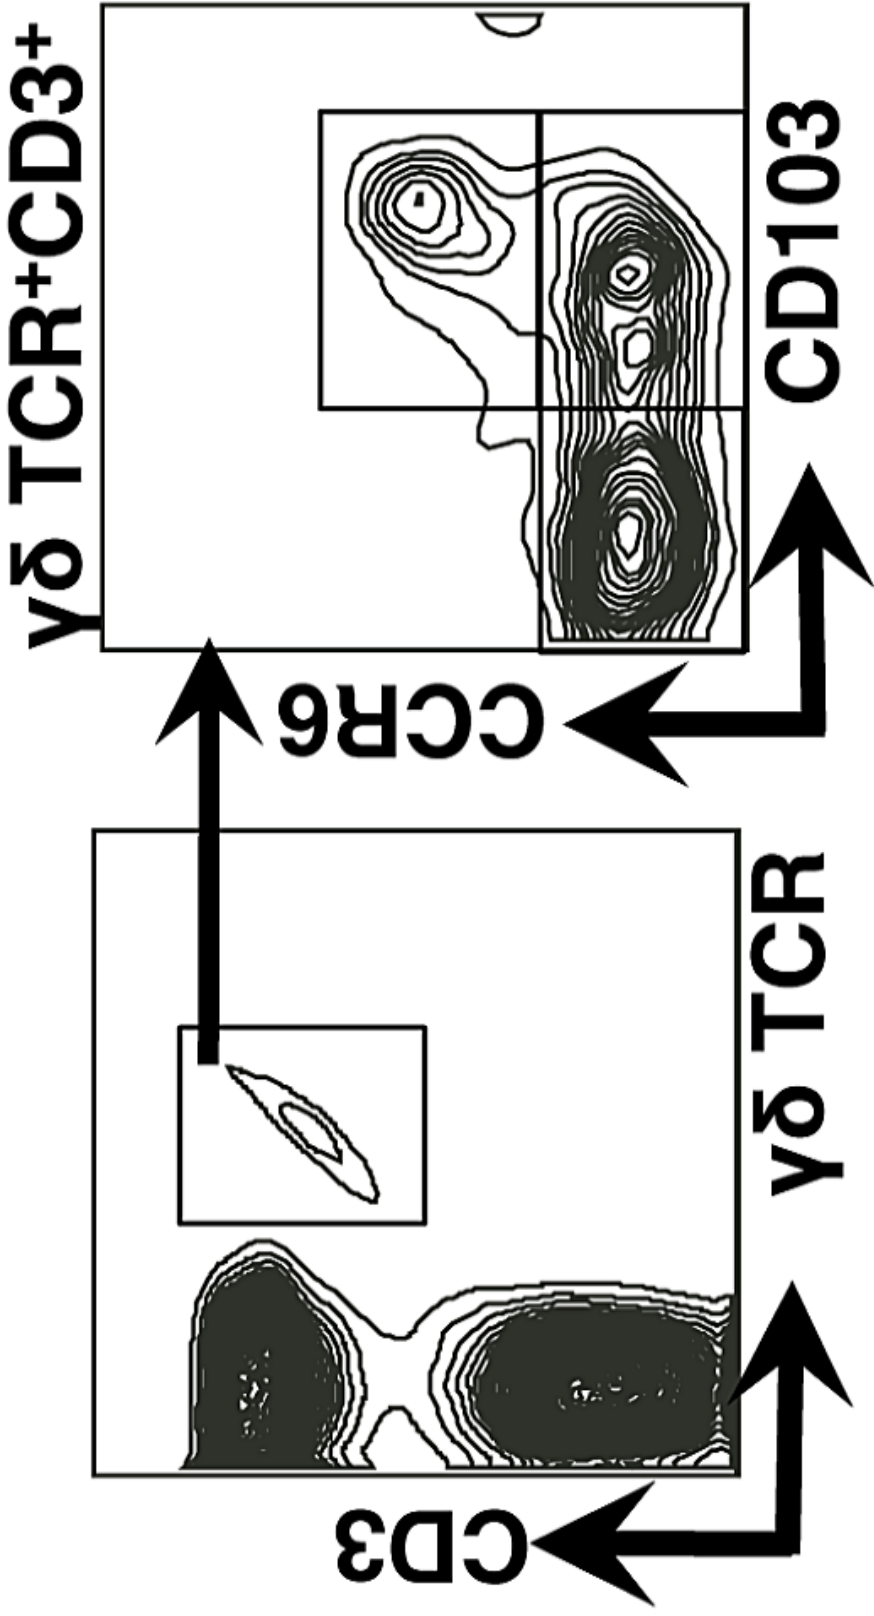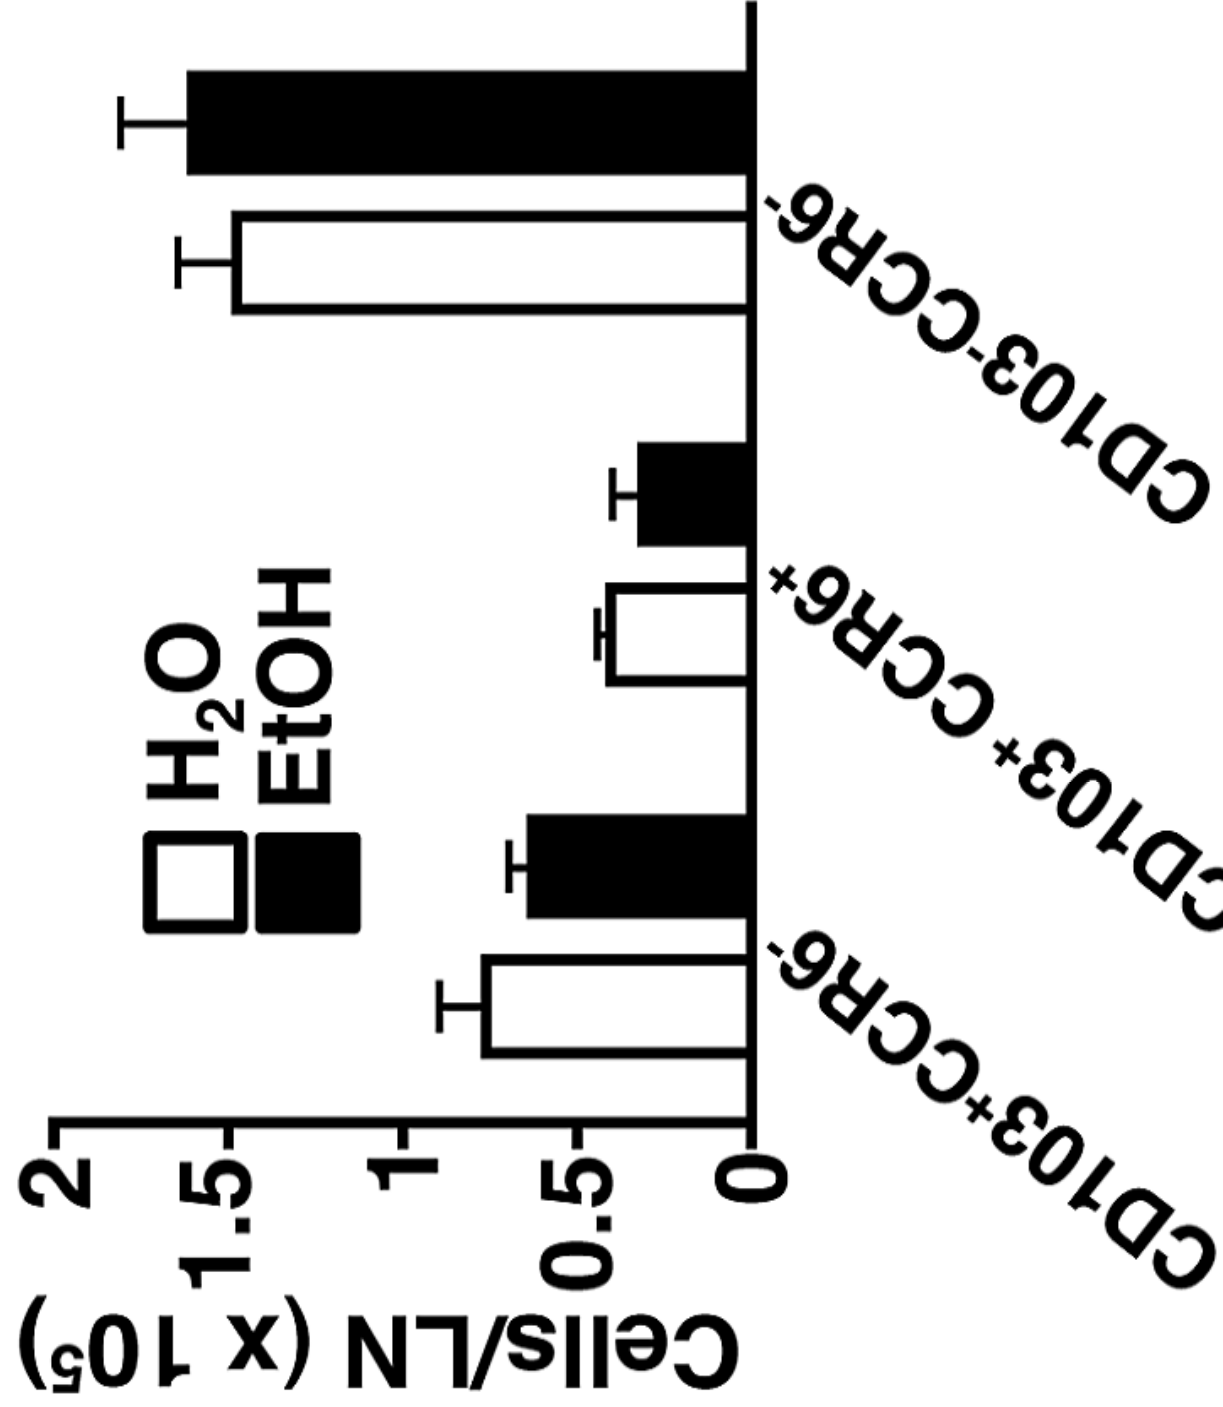

Supplement: NIHMS688440-supplement-SuppFigure.pdf [file NIHMS688440-supplement-SuppFigure.pdf]
